# Supplementary material
Source: PubMed Central journal article supplement (PMC3247968)
Supplement: supp_M111.315895_jbc.M111.315895-1.pdf [file supp_M111.315895_jbc.M111.315895-1.pdf]

## Subunit and Domain Requirements for Adenylate-Mediated Protection of Snf1 Activation Loop from Dephosphorylation\*

**Dakshayini G. Chandrashekarappa, Rhonda R. McCartney and Martin C. Schmidt**

### Supplementary Figure Legends

FIGURE S1. **HPLC analysis of nucleotides.** Adenylate nucleotides were analyzed for purity on an Altima HP-C18 HPLC column (5 $\mu$ m, 250 mm x 4.6 mm) developed with 50 mM sodium phosphate pH 6.0. ATP, ADP and AMP were clearly resolved when analyzed individually (A-C) or as a mixture of all three (D).

FIGURE S2. **Affinity purified preparations of PP2C and Snf1-TAP do not hydrolyze ADP.** In vitro dephosphorylation reactions containing 1 mM ADP, 20 mM Hepes (pH 7.0), 0.5 mM EDTA, 0.5 mM dithiothreitol and 5 mM magnesium acetate were incubated for 10 minutes at 37°C followed by phenol extraction and HPLC analysis. Reactions contained either no added protein (A), PP2C (B) or Snf1-TAP (C).

FIGURE S3. **Alignment of Snf1 with human AMPK  $\alpha$ 1.** The alignment was generated with the BLAST program for alignment of two sequences and shows Snf1 residues 42-585 and human  $\alpha$ 1 residues 14-481. Regions shaded are those deleted from the constructs Snf1-d381-488 and human  $\alpha$ 1-d377-411.

FIGURE S4. **Alignment of  $\beta$  Subunits.** The C-termini of  $\beta$  subunits from *Saccharomyces cerevisiae* (Gal83, Sip1 and Sip2) are aligned with the C-termini of  $\beta$  subunits from a variety of species from diverse lineages. The two histidine residues that contact the kinase activation loop in the phosphatase resistant conformation are conserved throughout all species and are marked with asterisks. Abbreviations used are as follows: Hs, *Homo sapiens*; Xl, *Xenopus laevis*; Dr, *Danio rerio*; Dm, *Drosophila melanogaster*; Ce, *Caenorhabditis elegans*; Mb, *Monosiga brevicollis*; Sp, *Schizosaccharomyces pombe*; At, *Arabidopsis thaliana*.

FIGURE S1

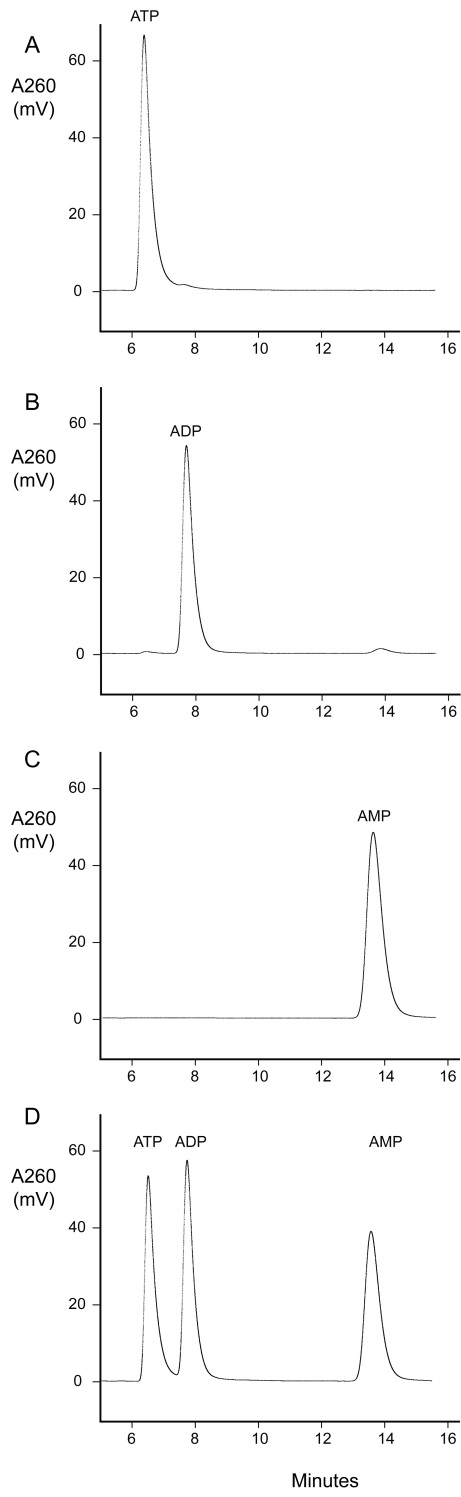

FIGURE S2

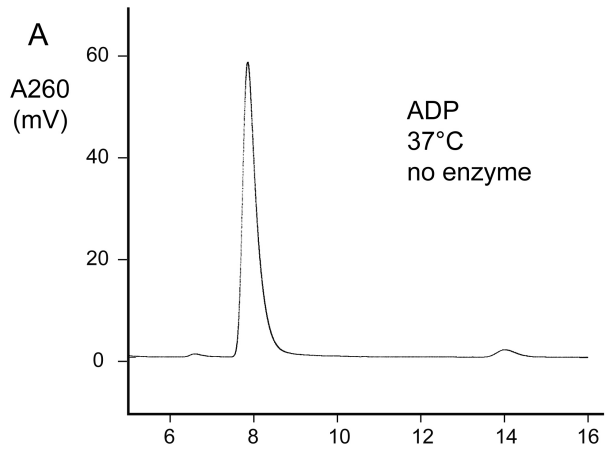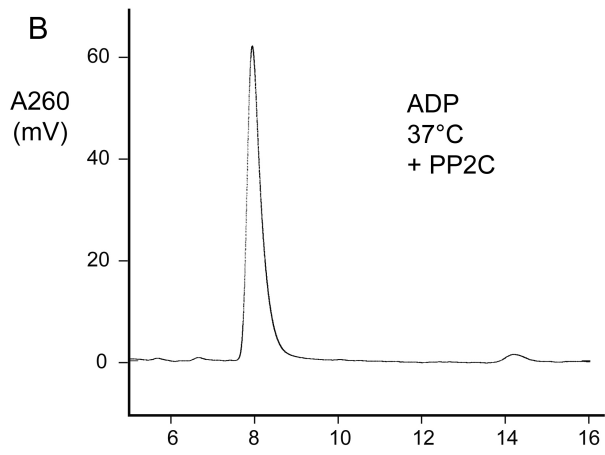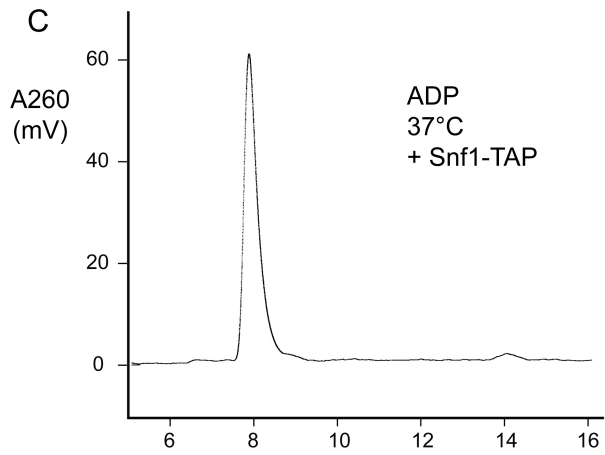

FIGURE S3

|       |     |                                                                       |     |
|-------|-----|-----------------------------------------------------------------------|-----|
| Snf1  | 42  | PKSSLA-----DG-AHIGNYQIVKTLGEGSFGKVKLAYHTTTGQKVALKIINKKVLAKSD          | 95  |
|       |     | P+ S+A DG IG+Y + TLG G+FGKVK+ H TG KVA+KI+N++ + D                     |     |
| Hs al | 14  | PRGSMAEKQKHDGRVKIGHYILGDTLGVGTFGKVKVKGHELTGHKVAVKILNRQKIRSLD          | 73  |
| Snf1  | 96  | MQGRIEREISYLRLLRHPHIKLYDVIKSKDEIIMVIEY-AGNELFDYIVQRDKMSEQEA           | 154 |
|       |     | + G+I REI L+L RHPHIKLY VI + +I MV+EY +G ELFDYI + ++ E+E+              |     |
| Hs al | 74  | VVGKIRREIQNLKLFRRPHIHKLYQVISTPSDIFVMMEYVSGGELFDYICKNGRLDEKES          | 133 |
| Snf1  | 155 | RRFFQQIISAVEYCHRHKIVHRDLKPENLLLDEHLNVKIADFGLSNIMTDGNFLKTSCGS          | 214 |
|       |     | RR FQOI+S V+YCHRH +VHRDLKPEN+LLD H+N KIADFGLSN+M+DG FL+TSCGS          |     |
| Hs al | 134 | RRLFQQILSGVDYCHRHMVHRDLKPENVLLDAHNAKIADFGLSNMMSDGEFLRTSCGS            | 193 |
| Snf1  | 215 | PNYAAPPEVISGKLYAGPEVDVWSCGVILYVMLCRRLPFDDDESIPVLFKNISNGVYTLPKF        | 274 |
|       |     | PNYAAPPEVISG+LYAGPEVD+WS GVILY +LC LPFDD+ +P LFK I +G++ P++           |     |
| Hs al | 194 | PNYAAPPEVISGRLYAGPEVDIWSSGVILYALLCGTLPFDDDHVPTLFFKICDGFYTPQY          | 253 |
| Snf1  | 275 | LSPGAAGLIKRMILVNPLNRISIEIMQDDWFKVDLPEYLLPDLKPHPEEENENNDSSK            | 334 |
|       |     | L+P L+K ML V+P+ R +I +I + +WFK DLP+YL P D                             |     |
| Hs al | 254 | LNPSVISLLKHMLQVDPMKRATIKDIREHEWFKQDLPKYLPED-----                      | 297 |
| Snf1  | 335 | DGSSPDNDEIDDNLVNLISSTMGYEKDEIYESLESSEDTPAFNEIRD <b>DAYMLIKENKSLIK</b> | 394 |
|       |     | S + IDD + + ++E+ L + + + AY LI +N+ ++                                 |     |
| Hs al | 298 | --PSYSSTMIDDEALKEVCEKFECSSEEEVLSCLYNRNHQ---DPLAVAYHLIIDNRRIMN         | 352 |
| Snf1  | 395 | <b>DMKANKSVSDELDTFLSQSPP-TFQQQSKSHQKSQVDHETAKQHARRMASAITQORTYHQ</b>   | 453 |
|       |     | + K D +L+ SPP +F DH + H R+                                            |     |
| Hs al | 353 | EAK-----DFYLATSPDPSFLD-----DHHLTR <b>HPERV</b> -----                  | 381 |
| Snf1  | 454 | <b>SPPMDQYKEEDSTVSILPTSLPQIHRANMLAQGSPA</b> ASKISPLVTKKSKTRWHFGIRSR   | 513 |
|       |     | PF+ V+ P + + L + +P SK + K +WH GIRS+S                                 |     |
| Hs al | 382 | <b>-PFL-----VAETPRA-----RHTLDELNPQKSKHQGV-----RKAKWHLGIRSQS</b>       | 421 |
| Snf1  | 514 | YPLDVMGEIYIALKNLGAEWAKPSEEDLWTIKLRWKYDIGNKTNTNEKIPDLMKMVIQLF          | 573 |
|       |     | P D+M E+ A+K L EW + + +++R K N KM +QL+                                |     |
| Hs al | 422 | RPNDIMAEVCRAIKQLDYEWKVVNP---YYLRVRRK-----NPVTSTFSKMSLQLY              | 469 |
| Snf1  | 574 | QIETNNYLVD <b>FK</b> 585                                              |     |
|       |     | Q+++ YL+DF+                                                           |     |
| Hs al | 470 | QVDSRTYLLDFR 481                                                      |     |

FIGURE S4

```

                                *   *
Sip1  PLYLNSSYLNRILNQSNQNSSEHERDEGATNHIIPHVNLNHLLTS SIRDE--IISVACTTRYEGKFTIQVYVAFPCYYKTQKSQISN
Gal83 PPOLPPHLENVILNSYSNAQTDN---TSCALPIPNHVILNHLATSSIKHN--TLCVASIVRYKQKYVTQILYTPIQ-----
Sip2  PPOLPPHLENVILNKYYATQDFNENNSGALPIPNHVILNHLVTS SIKHN--TLCVASIVRYKQKYVTQILYTPIESS-----
Hs    PPILPPHLLQVILNKDTGISCDP----ALLPEPNHVMLNHLIALSISKDG--VMVLSATHRYKKKYVTTLLYKPI-----
Xl    PPILPPHLLQVILNKDTGISCDP----ALLPEPNHVMLNHLIALSISKDG--VMVLSATHRYKKKYVTTLLYKPI-----
Dr    PPILPPHLLQVILNKDTNVSCDP----ALLPEPNHVMLNHLIALSISKDG--VMVLSATHRYKKKYVTTLLYKPI-----
Dm    PPVLPFHLLQVILNKDTPLSCDP----TLLPEPNHVMLNHLIALSISKDG--VMVLSATHRYKKKYVTTLLYKPI-----
Ce    PPVLPFHLLQVILNKDTPVQCDP----NVLPEPNHVMLNHLIALSISKDG--VMVLSATHRYKKKYVTTLLYKPI-----
Mb    PPRLPPELLOCCQLMADP-PNNDP----TQVKPPNHVMLNHLIALSISKDN--VIVMGASHRYKQKQFVTTVLYKPLSTD-----
Sp    PPSLPFHLEKQILNSNTAYKEDQ----SVLPNPNHVILNHLAANTQLG--VLALSATTRYERKYVTTAMEKNFDV-----
At    PPVVPFHLLQMTLMLPAANPDIP----SPLRPQHVILNHLIYMQKGRSGPSVVALGSTRHFLAKYVTVVLYKSLQR-----

```
